# Supplementary material
Source: PubMed Central journal article supplement (PMC5030845)
Supplement: NIHMS812962-supplement-1.pdf [file NIHMS812962-supplement-1.pdf]

## Supplementary Data

### Figure & Table Legends

**Figure S1: C152S-GAPDH over-expression protects catalase oligomerization from NO effects.** HEK cells co-transfected with either WT or C152S mutant of GAPDH were subjected to NO doses for 20hrs. Lysates were tested for total and tetrameric catalase. Basal tetramerization level of catalase in the absence of NO treatment is shown only for GAPDH.

**Figure S2: Fractionation profile of normal and inflamed lung lysates.** Soluble lysates from lungs of PBS control (Naïve) or OVA-challenged (OVA) mice were fractionated using gel permeation chromatography. Elution profile using 280nm detector are shown. Arrows show injection of lysates onto the column.

**Table S1: Corresponding molecular weights of collected fractions.** Corresponding molecular weights (in KD) of related fractions are shown in a Table.

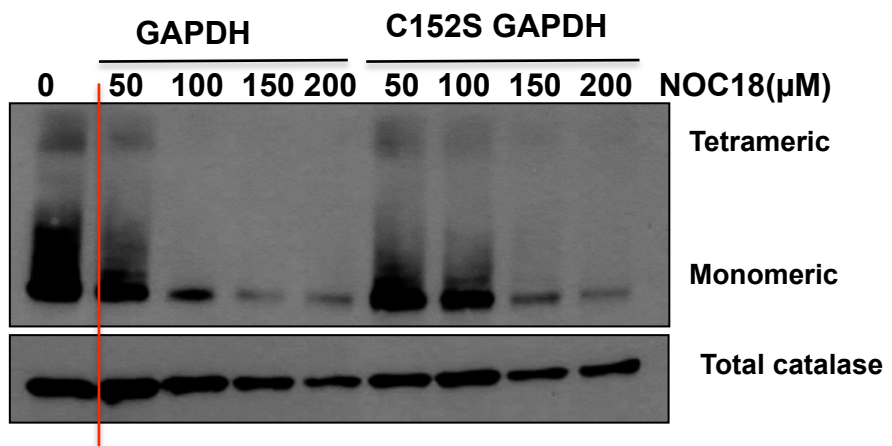

Figure S1

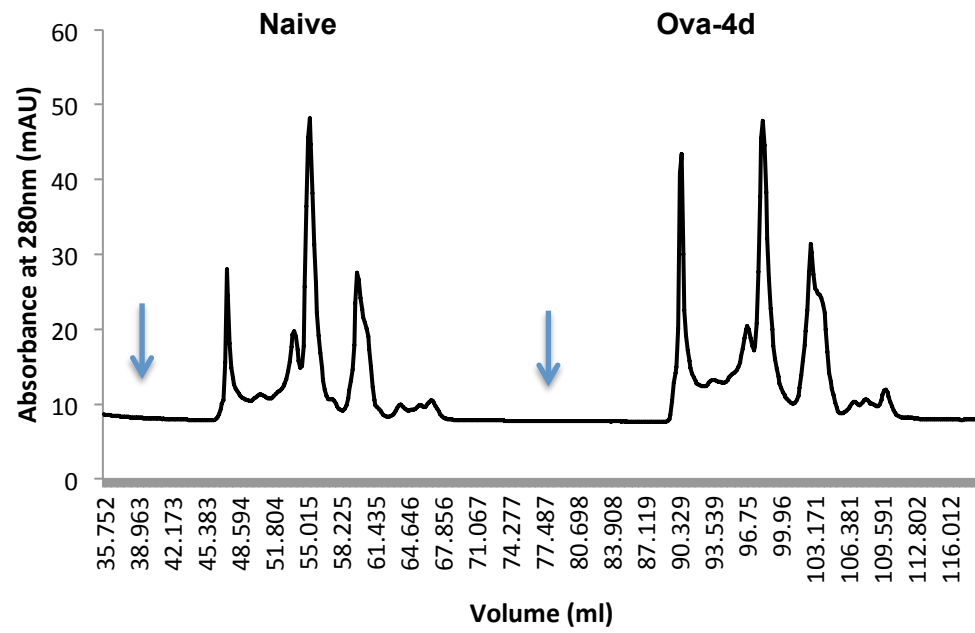

Figure S2

## Supplementary Data

|                             |
|-----------------------------|
| Fraction 7= 296KD= Tetramer |
| Fraction 8= 240KD= Tetramer |
| Fraction 9= 188KD           |
| Fraction 10= 147KD          |
| Fraction 11= 115 = Dimer    |
| Fraction 12 = 90 KD         |
| Fraction 13= 70KD= Monomer  |
| Fraction 14 = 55KD= Monomer |
